# Supplementary material for: A shiitake-derived nitrogen/oxygen/phosphorus co-doped carbon framework with hierarchical tri-modal porosity for high-performance electrochemical capacitors
Source: Royal Society of Chemistry journal article supplement (doi:10.1039/c6ra13689c), 2016-01-01
Supplement: c6ra13689c1.pdf [file c6ra13689c1.pdf]

## Supporting Information

### **Shiitake-Derived Nitrogen/Oxygen/Phosphorus Co-Doped Carbon Framework with Hierarchical Tri-Modal Porosity for High-Performance Electrochemical Capacitors**

*Hui Cao,<sup>‡</sup> Zhiyi Chen,<sup>‡</sup> Qiuli Chen, Chao Yang, Linrui Hou,\* Muhammad Rehan, Liuniu Tong, Changzhou Yuan\**

*School of Materials Science & Engineering, Anhui University of Technology, Ma'anshan, 243002, P. R. China*

<sup>‡</sup> These authors contributed equally to this work

#### **\*Correspondence author**

E-mail: [houlr629@163.com](mailto:houlr629@163.com) (L. R. Hou)

[ayuancz@163.com](mailto:ayuancz@163.com) (C. Z. Yuan)

**Table S1** Chemical composition of the dry shiitake derived from EDS analysis

| Composition    | C  | O    | N   | Cl   | Cu   | K    |
|----------------|----|------|-----|------|------|------|
| Content (at.%) | 59 | 39.9 | 0.5 | 0.27 | 0.05 | 0.28 |

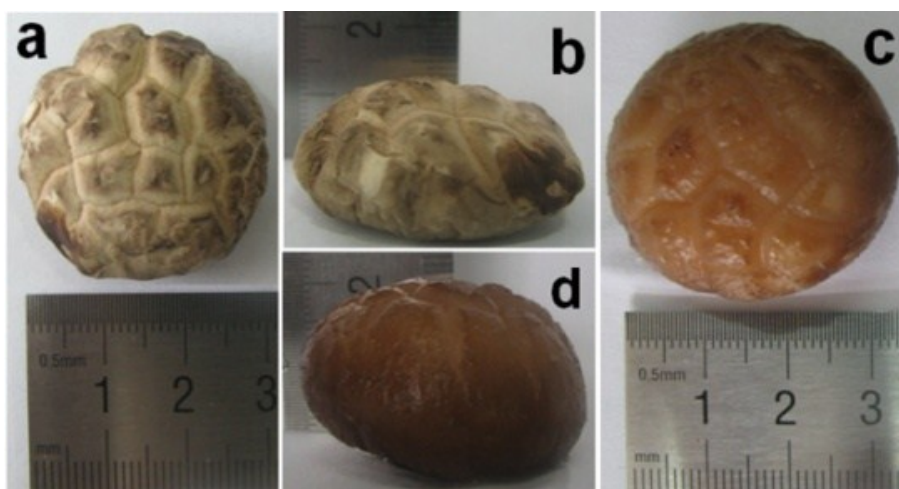

**Fig. S1.** Optical images for the aerial (a, c) and lateral (b, d) views of the shiitake before (a, b) and after (c, d) absorbing the  $(\text{NH}_4)_3\text{PO}_4$  aqueous solution

As shown in **Fig. S1a-d**, the volume of the shiitake is increased greatly after fully soaked with the  $(\text{NH}_4)_3\text{PO}_4$  solution.

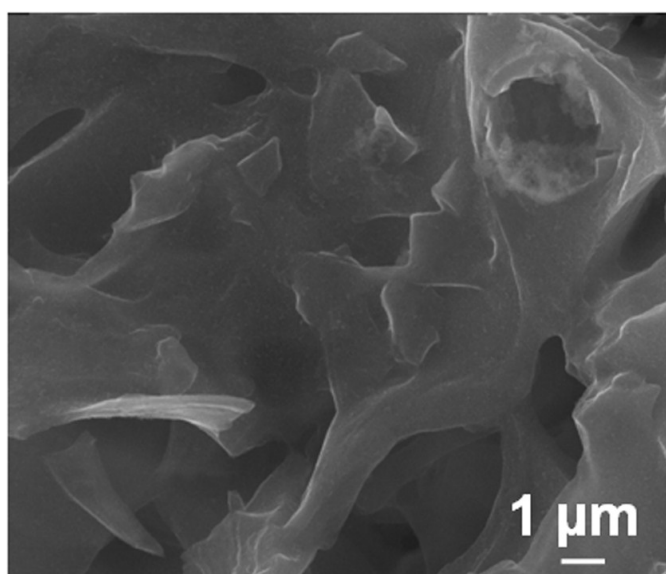

**Fig. S2.** FESEM image of the resultant SNOC product

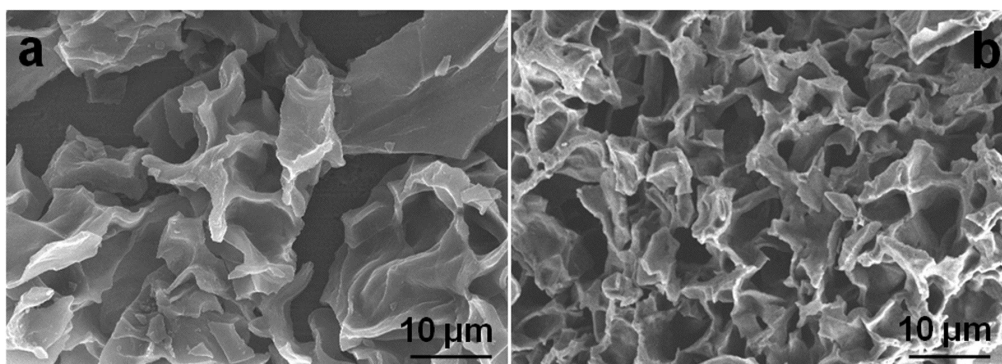

**Fig. S3.** FESEM image of the shiitake before (a) and after (b) absorbing the  $(\text{NH}_4)_3\text{PO}_4$  aqueous solution

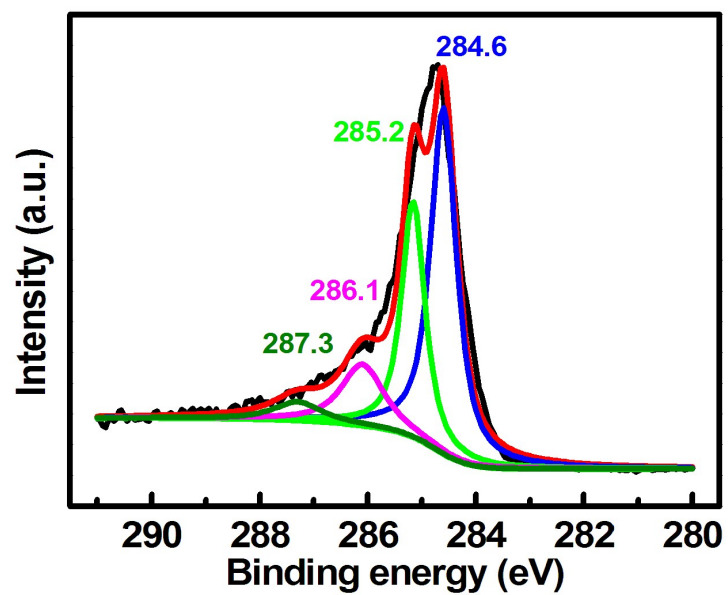

**Fig. S4.** High-resolution elemental C XPS spectrum and fitted data of the resultant SNOPC product

**Table S2** Relative contents of C, O and N species in the resultant SNOC product obtained from

EDS analysis

| Element                    | C    | O    | N   |
|----------------------------|------|------|-----|
| Relative content<br>(at.%) | 85.9 | 13.5 | 0.6 |

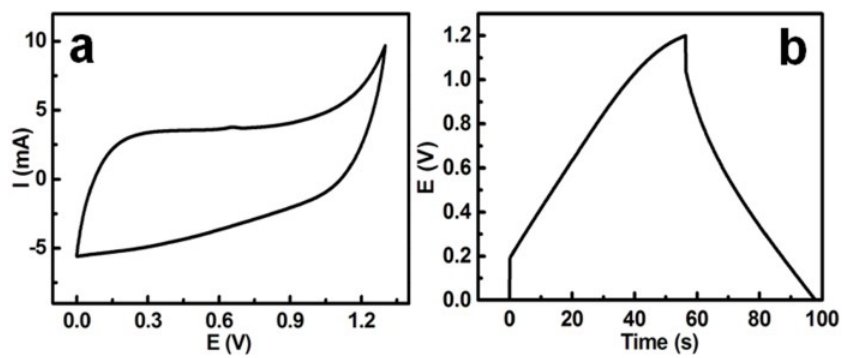

**Fig. S5.** CV curves ( $10 \text{ mV s}^{-1}$ ) and CP plot ( $1.0 \text{ A g}^{-1}$ ) of the SNOC-based symmetric device



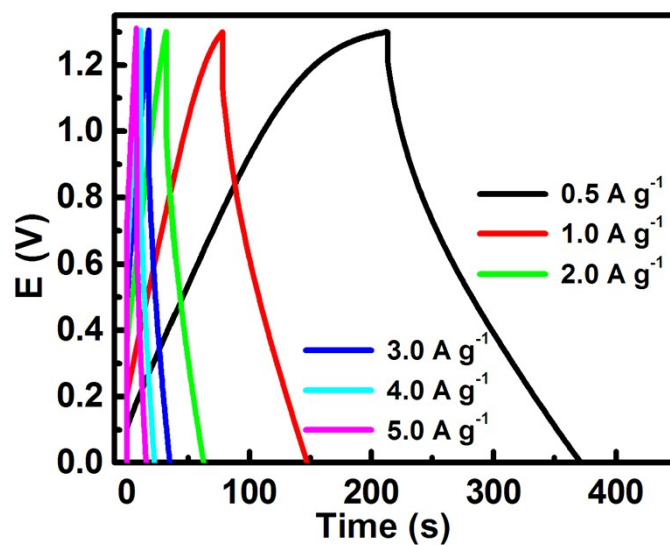

**Fig. S6.** CP profiles of the SNOPC-based symmetric device at a current range from 0.5 to 5  $A g^{-1}$

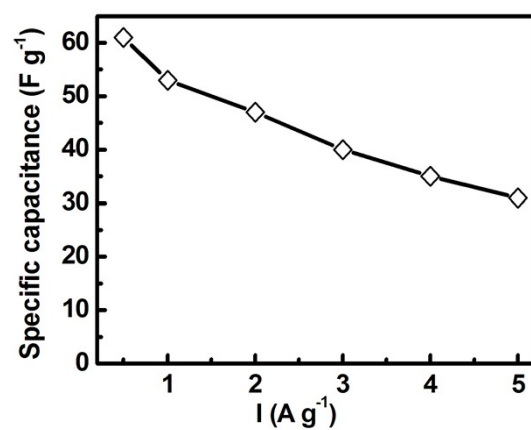

**Fig. S7.** Corresponding SCs the SNOPC-based symmetric device as a function of current density
